# Supplementary material for: Preventing and Managing Urinary Tract Infections: Enhancing the Role of Community Pharmacists—A Mixed Methods Study
Source: MDPI journal article supplement (doi:10.3390/antibiotics9090583), 2020-09-07

## Supplementary materials S6: Survey with service users – full results

| Service users                                                         |                                                   | n (%) (n=51)                    |
|-----------------------------------------------------------------------|---------------------------------------------------|---------------------------------|
| Women                                                                 |                                                   | 43 (84)                         |
| Age                                                                   |                                                   |                                 |
|                                                                       | Children                                          | 1 (2) (completed by the mother) |
|                                                                       | 18-24                                             | 8 (16)                          |
|                                                                       | 25-34                                             | 10 (20)                         |
|                                                                       | 35-44                                             | 4 (8)                           |
|                                                                       | 45-54                                             | 11 (22)                         |
|                                                                       | 55-64                                             | 7 (14)                          |
|                                                                       | 65-74                                             | 4 (8)                           |
|                                                                       | >75                                               | 4 (8)                           |
| Ethnicity                                                             |                                                   |                                 |
|                                                                       | White                                             | 27 (53)                         |
|                                                                       | Asian                                             | 14 (27)                         |
|                                                                       | Black                                             | 4 (8)                           |
|                                                                       | Mixed                                             | 4 (8)                           |
| Marital status                                                        |                                                   |                                 |
|                                                                       | Married                                           | 22 (43)                         |
|                                                                       | Single                                            | 16 (31)                         |
|                                                                       | Widowed                                           | 9 (18)                          |
|                                                                       | Divorced                                          | 4 (8)                           |
| UTI history                                                           |                                                   |                                 |
|                                                                       | Recurrent UTIs                                    | 21 (41)                         |
|                                                                       | One or two prior episodes                         | 23 (45)                         |
|                                                                       | No prior episode                                  | 6 (12)                          |
| Went to the pharmacy                                                  |                                                   |                                 |
|                                                                       | to pick up antibiotics after GP/nurse visit       | 35 (67)                         |
|                                                                       | before visiting another healthcare professional   | 12 (24)                         |
|                                                                       | Because the symptoms came back or did not go away | 2 (4)                           |
| Other sources of information (than GP/nurse or pharmacist)            |                                                   |                                 |
|                                                                       | Family                                            | 15 (29)                         |
|                                                                       | Online e.g. NHS choices                           | 9 (18)                          |
|                                                                       | None                                              | 27 (53)                         |
| Selfcare before healthcare professional                               |                                                   |                                 |
|                                                                       | Drink more fluids                                 | 31 (62)                         |
|                                                                       | Cystitis sachets                                  | 15 (30)                         |
|                                                                       | Cranberry juice                                   | 12 (24)                         |
|                                                                       | Rest                                              | 10 (20)                         |
|                                                                       | Painkillers                                       | 8 (16)                          |
|                                                                       | Nothing                                           | 7 (14)                          |
|                                                                       | Time off work                                     | 6 (12)                          |
|                                                                       | NSAIDs                                            | 3 (6)                           |
|                                                                       | Lemon / orange juice                              | 2 (4)                           |
| Did you buy OTC products in the pharmacy?                             |                                                   |                                 |
|                                                                       | Yes                                               | 22 (43)                         |
|                                                                       | NSAIDs                                            | 13 (25)                         |
|                                                                       | Cystitis sachets                                  | 9 (18)                          |
|                                                                       | Paracetamol                                       | 4 (8)                           |
|                                                                       | Cranberry tablets                                 | 3 (6)                           |
|                                                                       | No                                                | 29 (57)                         |
| Who would you feel comfortable discussing your urinary symptoms with? |                                                   |                                 |
|                                                                       | GP / nurse                                        | 18 (35)                         |
|                                                                       | Pharmacy staff                                    | 7 (14)                          |

|                            |                                                                        |         |
|----------------------------|------------------------------------------------------------------------|---------|
|                            | GP/nurse or pharmacy staff                                             | 26 (51) |
| The leaflet is more useful |                                                                        |         |
|                            | with urinary symptoms, before visiting another healthcare professional | 28 (55) |
|                            | when picking up antibiotics prescribed for a UTI                       | 12 (24) |
|                            | when the urinary symptoms came back or did not go away                 | 7 (14)  |
| Experience in the pharmacy |                                                                        |         |
|                            | Excellent                                                              | 18 (35) |
|                            | Good                                                                   | 25 (49) |
|                            | Fair                                                                   | 8 (16)  |
|                            | Poor                                                                   | 0       |

## Service users

### Pharmacy staff should discuss UTI leaflets with patients/carers...(Q9)

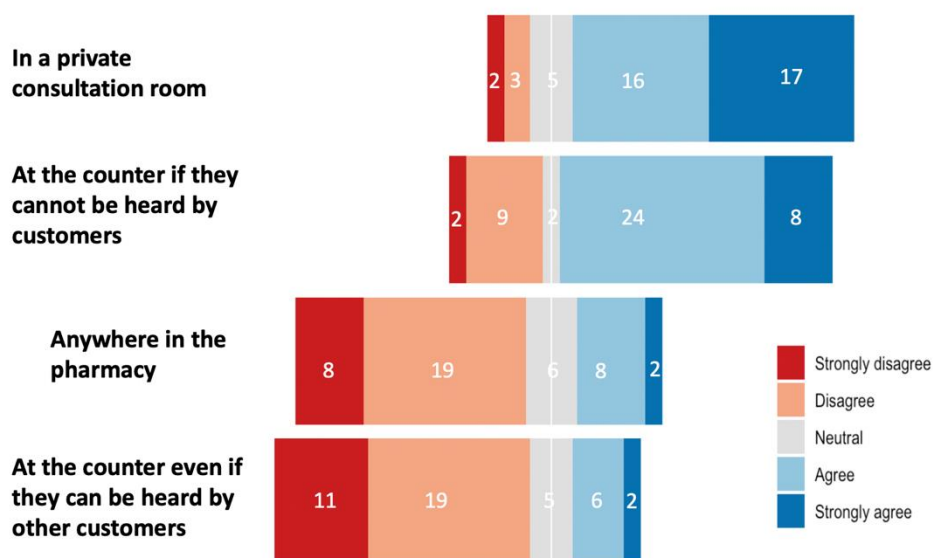

Supplement: s1 [file s1]
