# Supplementary material for: Preventing and Managing Urinary Tract Infections: Enhancing the Role of Community Pharmacists—A Mixed Methods Study
Source: MDPI journal article supplement (doi:10.3390/antibiotics9090583), 2020-09-07
Supplement: s1 [file s1]

## **Supplementary material S2– Post-intervention interview schedule with pharmacists**

Hello, the purpose of this interview is to discuss how you found trialling the UTI leaflets in your pharmacy.

- 1. Can you please give the number on the leaflets (upper corner) that you have?**
- 2. How long did you trial the leaflets for?** *Probe: How many weeks, if they didn't trial for as long as expected ask them why?*
- 3. Were you the only person trialing the leaflets or did others trial them? Who?**
- 4. How did you find using the leaflets in the pharmacy?**
- 5. If others trialed the leaflets, do you know what they thought about the leaflets?**
- 6. Did you offer the leaflet to all the women and older adults with UTI symptoms?**  
*Probe: if not, why?*
- 7. Can you take me through an example scenario of how you used the leaflet with a woman under 65? Was it different from using the leaflet with an older adult?**
- 8. Did you use the leaflet differently between service users:**
  - coming first to the pharmacy and that you then referred to the GP
  - service users coming first to the pharmacy and not referred on
  - service users coming after a GP visit?

### **Leaflet < 65**

- 9. How did the women younger than 65 adults respond to the leaflet?** *Probe: did they comment on the leaflet, did they take them away, was there any negative feedback?*
- 10. Were there any sections of the leaflet that were difficult to use/explain?**

### **Leaflet > 65**

- 11. How did the older adults respond to the leaflet?** *Probe: did they comment on the leaflet, did they take them away, was there any negative feedback?*

**12. Were there any sections of the leaflet that were difficult to use/explain?**

### **Leaflets**

**13. Now that you have experience in using the leaflets, what would you change to make them more user friendly in the pharmacy setting?**

**14. Do you have any other comments about the leaflet or trialing the leaflet that you would like to add? *Probe: potential drawbacks?***

Taking into account your interviews before the intervention, PHE have modified the leaflets and have produced one combined leaflet.

**15. What do you think of the new leaflet?**

**16. Do you think that this leaflet could be easier to use than the two leaflets separately in your pharmacy? Do you see any drawbacks to the new combined leaflet?**

**17. Would you recommend using the leaflet to your colleagues?**

**18. Do you think that photos should be replaced with graphics?**

### **General questions**

**19. In your opinion, when should a service user with UTI symptoms seek advice?**

**20. In your opinion, from whom should a service user with symptoms seek advice?**  
*Probe: Pharmacy first? GP first? Someone else?*

**21. When and why do you refer service users with suspected or confirmed UTI to the GP?**
